# Supplementary material for: Simultaneous Detection of Oseltamivir- and Amantadine-Resistant Influenza by Oligonucleotide Microarray Visualization
Source: PubMed Central journal article supplement (PMC3579783; doi:10.1371/journal.pone.0057154), 2013-02-22
Supplement: pone.0057154.s003.pdf [file pone.0057154.s003.pdf]

The sensitivity of the method to distinguish the mixed population of 2009 influenza A (H1N1)

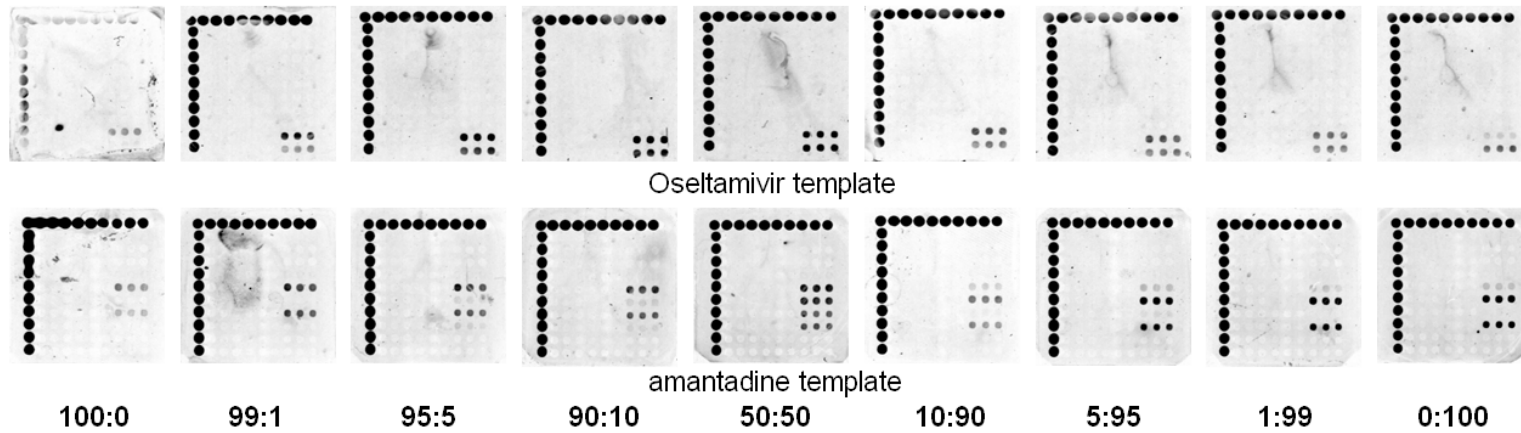

The results showed that the microarray detected the minor population in mixed template when it was more than 1% for oseltamivir (top line) and 5% for amantadine (underside line).
