# Supplementary material for: Simultaneous Detection of Oseltamivir- and Amantadine-Resistant Influenza by Oligonucleotide Microarray Visualization
Source: PubMed Central journal article supplement (PMC3579783; doi:10.1371/journal.pone.0057154), 2013-02-22
Supplement: pone.0057154.s004.pdf [file pone.0057154.s004.pdf]

The sequencing results of 161 positive samples of influenza A virus.

Influenza A (H3N2) M gene

|                              | 21 | 30                      | 40                             | 50      | 60               | 70      | 80               |
|------------------------------|----|-------------------------|--------------------------------|---------|------------------|---------|------------------|
| Yiwu 2-Influenza A(H3N2)-M   | 19 | GCAACGATTCAAGTGACCCGCTT | STGTTGCCGCGAATATCATTGGGATCTTGC | ACTTGTG | ATCATTGGGATCTTGC | ACTTGTG | ATCATTGGGATCTTGC |
| Yiwu 5-Influenza A(H3N2)-M   | 19 | GCAACGATTCAAGTGACCCGCTT | STGTTGCCGCGAATATCATTGGGATCTTGC | ACTTGTG | ATCATTGGGATCTTGC | ACTTGTG | ATCATTGGGATCTTGC |
| Yiwu 12-Influenza A(H3N2)-M  | 19 | GCAACGATTCAAGTGACCCGCTT | STGTTGCCGCGAATATCATTGGGATCTTGC | ACTTGTG | ATCATTGGGATCTTGC | ACTTGTG | ATCATTGGGATCTTGC |
| Yiwu 13-Influenza A(H3N2)-M  | 21 | GCAACGATTCAAGTGACCCGCTT | STGTTGCCGCGAATATCATTGGGATCTTGC | ACTTGTG | ATCATTGGGATCTTGC | ACTTGTG | ATCATTGGGATCTTGC |
| Yiwu 14-Influenza A(H3N2)-M  | 19 | GCAACGATTCAAGTGACCCGCTT | STGTTGCCGCGAATATCATTGGGATCTTGC | ACTTGTG | ATCATTGGGATCTTGC | ACTTGTG | ATCATTGGGATCTTGC |
| Yiwu 16-Influenza A(H3N2)-M  | 21 | GCAACGATTCAAGTGACCCGCTT | STGTTGCCGCGAATATCATTGGGATCTTGC | ACTTGTG | ATCATTGGGATCTTGC | ACTTGTG | ATCATTGGGATCTTGC |
| Yiwu 17-Influenza A(H3N2)-M  | 20 | GCAACGATTCAAGTGACCCGCTT | STGTTGCCGCGAATATCATTGGGATCTTGC | ACTTGTG | ATCATTGGGATCTTGC | ACTTGTG | ATCATTGGGATCTTGC |
| Yiwu 19-Influenza A(H3N2)-M  | 19 | GCAACGATTCAAGTGACCCGCTT | STGTTGCCGCGAATATCATTGGGATCTTGC | ACTTGTG | ATCATTGGGATCTTGC | ACTTGTG | ATCATTGGGATCTTGC |
| Yiwu 21-Influenza A(H3N2)-M  | 18 | GCAACGATTCAAGTGACCCGCTT | STGTTGCCGCGAATATCATTGGGATCTTGC | ACTTGTG | ATCATTGGGATCTTGC | ACTTGTG | ATCATTGGGATCTTGC |
| Yiwu 25-Influenza A(H3N2)-M  | 19 | GCAACGATTCAAGTGACCCGCTT | STGTTGCCGCGAATATCATTGGGATCTTGC | ACTTGTG | ATCATTGGGATCTTGC | ACTTGTG | ATCATTGGGATCTTGC |
| Yiwu 32-Influenza A(H3N2)-M  | 21 | GCAACGATTCAAGTGACCCGCTT | STGTTGCCGCGAATATCATTGGGATCTTGC | ACTTGTG | ATCATTGGGATCTTGC | ACTTGTG | ATCATTGGGATCTTGC |
| Yiwu 172-Influenza A(H3N2)-M | 19 | GCAACGATTCAAGTGACCCGCTT | STGTTGCCGCGAATATCATTGGGATCTTGC | ACTTGTG | ATCATTGGGATCTTGC | ACTTGTG | ATCATTGGGATCTTGC |
| Yiwu 175-Influenza A(H3N2)-M | 19 | GCAACGATTCAAGTGACCCGCTT | STGTTGCCGCGAATATCATTGGGATCTTGC | ACTTGTG | ATCATTGGGATCTTGC | ACTTGTG | ATCATTGGGATCTTGC |
| Yiwu 176-Influenza A(H3N2)-M | 21 | GCAACGATTCAAGTGACCCGCTT | STGTTGCCGCGAATATCATTGGGATCTTGC | ACTTGTG | ATCATTGGGATCTTGC | ACTTGTG | ATCATTGGGATCTTGC |

27V 31N

Influenza A (H3N2) NA gene

|                               | 105 | 110                       | 120                        | 130          | 140                       | 150                        | 160          |
|-------------------------------|-----|---------------------------|----------------------------|--------------|---------------------------|----------------------------|--------------|
| Yiwu 2-Influenza A(H3N2)-NA   | 96  | GGGGACATTTGGGTGACAAGAGAAC | CCCTTATGTGTCATGCGATCCTGACA | AGTGTATCAATT | GGGGACATTTGGGTGACAAGAGAAC | CCCTTATGTGTCATGCGATCCTGACA | AGTGTATCAATT |
| Yiwu 5-Influenza A(H3N2)-NA   | 99  | GGGGACATTTGGGTGACAAGAGAAC | CCCTTATGTGTCATGCGATCCTGACA | AGTGTATCAATT | GGGGACATTTGGGTGACAAGAGAAC | CCCTTATGTGTCATGCGATCCTGACA | AGTGTATCAATT |
| Yiwu 12-Influenza A(H3N2)-NA  | 94  | GGGGACATTTGGGTGACAAGAGAAC | CCCTTATGTGTCATGCGATCCTGACA | AGTGTATCAATT | GGGGACATTTGGGTGACAAGAGAAC | CCCTTATGTGTCATGCGATCCTGACA | AGTGTATCAATT |
| Yiwu 13-Influenza A(H3N2)-NA  | 104 | GGGGACATTTGGGTGACAAGAGAAC | CCCTTATGTGTCATGCGATCCTGACA | AGTGTATCAATT | GGGGACATTTGGGTGACAAGAGAAC | CCCTTATGTGTCATGCGATCCTGACA | AGTGTATCAATT |
| Yiwu 14-Influenza A(H3N2)-NA  | 101 | GGGGACATTTGGGTGACAAGAGAAC | CCCTTATGTGTCATGCGATCCTGACA | AGTGTATCAATT | GGGGACATTTGGGTGACAAGAGAAC | CCCTTATGTGTCATGCGATCCTGACA | AGTGTATCAATT |
| Yiwu 16-Influenza A(H3N2)-NA  | 96  | GGGGACATTTGGGTGACAAGAGAAC | CCCTTATGTGTCATGCGATCCTGACA | AGTGTATCAATT | GGGGACATTTGGGTGACAAGAGAAC | CCCTTATGTGTCATGCGATCCTGACA | AGTGTATCAATT |
| Yiwu 17-Influenza A(H3N2)-NA  | 95  | GGGGACATTTGGGTGACAAGAGAAC | CCCTTATGTGTCATGCGATCCTGACA | AGTGTATCAATT | GGGGACATTTGGGTGACAAGAGAAC | CCCTTATGTGTCATGCGATCCTGACA | AGTGTATCAATT |
| Yiwu 19-Influenza A(H3N2)-NA  | 95  | GGGGACATTTGGGTGACAAGAGAAC | CCCTTATGTGTCATGCGATCCTGACA | AGTGTATCAATT | GGGGACATTTGGGTGACAAGAGAAC | CCCTTATGTGTCATGCGATCCTGACA | AGTGTATCAATT |
| Yiwu 21-Influenza A(H3N2)-NA  | 94  | GGGGACATTTGGGTGACAAGAGAAC | CCCTTATGTGTCATGCGATCCTGACA | AGTGTATCAATT | GGGGACATTTGGGTGACAAGAGAAC | CCCTTATGTGTCATGCGATCCTGACA | AGTGTATCAATT |
| Yiwu 25-Influenza A(H3N2)-NA  | 97  | GGGGACATTTGGGTGACAAGAGAAC | CCCTTATGTGTCATGCGATCCTGACA | AGTGTATCAATT | GGGGACATTTGGGTGACAAGAGAAC | CCCTTATGTGTCATGCGATCCTGACA | AGTGTATCAATT |
| Yiwu 32-Influenza A(H3N2)-NA  | 97  | GGGGACATTTGGGTGACAAGAGAAC | CCCTTATGTGTCATGCGATCCTGACA | AGTGTATCAATT | GGGGACATTTGGGTGACAAGAGAAC | CCCTTATGTGTCATGCGATCCTGACA | AGTGTATCAATT |
| Yiwu 176-Influenza A(H3N2)-NA | 94  | GGGGACATTTGGGTGACAAGAGAAC | CCCTTATGTGTCATGCGATCCTGACA | AGTGTATCAATT | GGGGACATTTGGGTGACAAGAGAAC | CCCTTATGTGTCATGCGATCCTGACA | AGTGTATCAATT |
| Yiwu 172-Influenza A(H3N2)-NA | 97  | GGGGACATTTGGGTGACAAGAGAAC | CCCTTATGTGTCATGCGATCCTGACA | AGTGTATCAATT | GGGGACATTTGGGTGACAAGAGAAC | CCCTTATGTGTCATGCGATCCTGACA | AGTGTATCAATT |
| Yiwu 175-Influenza A(H3N2)-NA | 95  | GGGGACATTTGGGTGACAAGAGAAC | CCCTTATGTGTCATGCGATCCTGACA | AGTGTATCAATT | GGGGACATTTGGGTGACAAGAGAAC | CCCTTATGTGTCATGCGATCCTGACA | AGTGTATCAATT |

119E

Seasonal influenza A (H1N1) M gene

|                                      | 21 | 30                      | 40                          | 50     | 60                      | 70                          |
|--------------------------------------|----|-------------------------|-----------------------------|--------|-------------------------|-----------------------------|
| Yiwu-3-Seasonal influenza A(H1N1)-M  | 20 | AACGATTCAAGTGATCCTCTTGT | TGTTGCCGCAATATAATTGGGATTGTG | CACCTG | AACGATTCAAGTGATCCTCTTGT | TGTTGCCGCAATATAATTGGGATTGTG |
| Yiwu-31-Seasonal influenza A(H1N1)-M | 21 | AACGATTCAAGTGATCCTCTTGT | TGTTGCCGCAATATAATTGGGATTGTG | CACCTG | AACGATTCAAGTGATCCTCTTGT | TGTTGCCGCAATATAATTGGGATTGTG |
| Yiwu-34-Seasonal influenza A(H1N1)-M | 20 | AACGATTCAAGTGATCCTCTTGT | TGTTGCCGCAATATAATTGGGATTGTG | CACCTG | AACGATTCAAGTGATCCTCTTGT | TGTTGCCGCAATATAATTGGGATTGTG |

27V 31N

Seasonal influenza A (H1N1) NA gene

|                                       | 91 | 100                     | 110                        | 120    | 130                     | 140                        |
|---------------------------------------|----|-------------------------|----------------------------|--------|-------------------------|----------------------------|
| Yiwu-3-Seasonal influenza A(H1N1)-NA  | 84 | TAGAGTTGAATGCACCCAATTTT | TATTATGAGGAATGCCTCTGTTACCC | AGATTA | TAGAGTTGAATGCACCCAATTTT | TATTATGAGGAATGCCTCTGTTACCC |
| Yiwu-31-Seasonal influenza A(H1N1)-NA | 91 | TAGAGTTGAATGCACCCAATTTT | TATTATGAGGAATGCCTCTGTTACCC | AGATTA | TAGAGTTGAATGCACCCAATTTT | TATTATGAGGAATGCCTCTGTTACCC |
| Yiwu-34-Seasonal influenza A(H1N1)-NA | 91 | TAGAGTTGAATGCACCCAATTTT | TATTATGAGGAATGCCTCTGTTACCC | AGATTA | TAGAGTTGAATGCACCCAATTTT | TATTATGAGGAATGCCTCTGTTACCC |

274Y





|                                   |      |                                       |      |
|-----------------------------------|------|---------------------------------------|------|
| 307-627-2009 influenza A(H1N1)-M  | (38) | TCTCGTCATTGCAGCAAAATATCATTGGGATCTTGCA | CCTG |
| 307-628-2009 influenza A(H1N1)-M  | (38) | TCTCGTCATTGCAGCAAAATATCATTGGGATCTTGCA | CCTG |
| 307-629-2009 influenza A(H1N1)-M  | (38) | TCTCGTCATTGCAGCAAAATATCATTGGGATCTTGCA | CCTG |
| 307-630-2009 influenza A(H1N1)-M  | (38) | TCTCGTCATTGCAGCAAAATATCATTGGGATCTTGCA | CCTG |
| Yiwu-7-2009 influenza A(H1N1)-M   | (38) | TCTCGTCATTGCAGCAAAATATCATTGGGATCTTGCA | CCTG |
| Yiwu-8-2009 influenza A(H1N1)-M   | (38) | TCTCGTCATTGCAGCAAAATATCATTGGGATCTTGCA | CCTG |
| Yiwu-11-2009 influenza A(H1N1)-M  | (38) | TCTCGTCATTGCAGCAAAATATCATTGGGATCTTGCA | CCTG |
| Yiwu-27-2009 influenza A(H1N1)-M  | (38) | TCTCGTCATTGCAGCAAAATATCATTGGGATCTTGCA | CCTG |
| Yiwu-28-2009 influenza A(H1N1)-M  | (37) | TCTCGTCATTGCAGCAAAATATCATTGGGATCTTGCA | CCTG |
| Yiwu-29-2009 influenza A(H1N1)-M  | (38) | TCTCGTCATTGCAGCAAAATATCATTGGGATCTTGCA | CCTG |
| Yiwu-33-2009 influenza A(H1N1)-M  | (38) | TCTCGTCATTGCAGCAAAATATCATTGGGATCTTGCA | CCTG |
| Yiwu-35-2009 influenza A(H1N1)-M  | (38) | TCTCGTCATTGCAGCAAAATATCATTGGGATCTTGCA | CCTG |
| Yiwu-36-2009 influenza A(H1N1)-M  | (38) | TCTCGTCATTGCAGCAAAATATCATTGGGATCTTGCA | CCTG |
| Yiwu-39-2009 influenza A(H1N1)-M  | (40) | TCTCGTCATTGCAGCAAAATATCATTGGGATCTTGCA | CCTG |
| Yiwu-42-2009 influenza A(H1N1)-M  | (37) | TCTCGTCATTGCAGCAAAATATCATTGGGATCTTGCA | CCTG |
| Yiwu-49-2009 influenza A(H1N1)-M  | (36) | TCTCGTCATTGCAGCAAAATATCATTGGGATCTTGCA | CCTG |
| Yiwu-52-2009 influenza A(H1N1)-M  | (38) | TCTCGTCATTGCAGCAAAATATCATTGGGATCTTGCA | CCTG |
| Yiwu-72-2009 influenza A(H1N1)-M  | (37) | TCTCGTCATTGCAGCAAAATATCATTGGGATCTTGCA | CCTG |
| Yiwu-80-2009 influenza A(H1N1)-M  | (38) | TCTCGTCATTGCAGCAAAATATCATTGGGATCTTGCA | CCTG |
| Yiwu-81-2009 influenza A(H1N1)-M  | (38) | TCTCGTCATTGCAGCAAAATATCATTGGGATCTTGCA | CCTG |
| Yiwu-82-2009 influenza A(H1N1)-M  | (38) | TCTCGTCATTGCAGCAAAATATCATTGGGATCTTGCA | CCTG |
| Yiwu-87-2009 influenza A(H1N1)-M  | (38) | TCTCGTCATTGCAGCAAAATATCATTGGGATCTTGCA | CCTG |
| Yiwu-89-2009 influenza A(H1N1)-M  | (39) | TCTCGTCATTGCAGCAAAATATCATTGGGATCTTGCA | CCTG |
| Yiwu-127-2009 influenza A(H1N1)-M | (36) | TCTCGTCATTGCAGCAAAATATCATTGGGATCTTGCA | CCTG |
| Yiwu-128-2009 influenza A(H1N1)-M | (31) | TCTCGTCATTGCAGCAAAATATCATTGGGATCTTGCA | CCTG |
| Yiwu-132-2009 influenza A(H1N1)-M | (39) | TCTCGTCATTGCAGCAAAATATCATTGGGATCTTGCA | CCTG |
| Yiwu-183-2009 influenza A(H1N1)-M | (38) | TCTCGTCATTGCAGCAAAATATCATTGGGATCTTGCA | CCTG |
| Yiwu-184-2009 influenza A(H1N1)-M | (38) | TCTCGTCATTGCAGCAAAATATCATTGGGATCTTGCA | CCTG |
| Consensus                         | (41) | TCTCGTCATTGCAGCAAAATATCATTGGGATCTTGCA | CCTG |

27V

31N





307-627-2009 influenza A(H1N1)-NA (96) ATGCCCCCTAATTATCACTATGAGGAATGCTCCTGTTATC  
307-628-2009 influenza A(H1N1)-NA (97) ATGCCCCCTAATTATCACTATGAGGAATGCTCCTGTTATC  
307-629-2009 influenza A(H1N1)-NA (101) ATGCCCCCTAATTATCACTATGAGGAATGCTCCTGTTATC  
307-630-2009 influenza A(H1N1)-NA (103) ATGCCCCCTAATTATCACTATGAGGAATGCTCCTGTTATC  
Yiwu-7-2009 influenza A(H1N1)-NA (100) ATGCCCCCTAATTATCACTATGAGGAATGCTCCTGTTATC  
Yiwu-8-2009 influenza A(H1N1)-NA (101) ATGCCCCCTAATTATCACTATGAGGAATGCTCCTGTTATC  
Yiwu-11-2009 influenza A(H1N1)-NA (99) ATGCCCCCTAATTATCACTATGAGGAATGCTCCTGTTATC  
Yiwu-27-2009 influenza A(H1N1)-NA (101) ATGCCCCCTAATTATCACTATGAGGAATGCTCCTGTTATC  
Yiwu-28-2009 influenza A(H1N1)-NA (99) ATGCCCCCTAATTATCACTATGAGGAATGCTCCTGTTATC  
Yiwu-29-2009 influenza A(H1N1)-NA (97) ATGCCCCCTAATTATCACTATGAGGAATGCTCCTGTTATC  
Yiwu-33-2009 influenza A(H1N1)-NA (100) ATGCCCCCTAATTATCACTATGAGGAATGCTCCTGTTATC  
Yiwu-35-2009 influenza A(H1N1)-NA (98) ATGCCCCCTAATTATCACTATGAGGAATGCTCCTGTTATC  
Yiwu-36-2009 influenza A(H1N1)-NA (96) ATGCCCCCTAATTATCACTATGAGGAATGCTCCTGTTATC  
Yiwu-39-2009 influenza A(H1N1)-NA (97) ATGCCCCCTAATTATCACTATGAGGAATGCTCCTGTTATC  
Yiwu-42-2009 influenza A(H1N1)-NA (98) ATGCCCCCTAATTATCACTATGAGGAATGCTCCTGTTATC  
Yiwu-49-2009 influenza A(H1N1)-NA (104) ATGCCCCCTAATTATCACTATGAGGAATGCTCCTGTTATC  
Yiwu-52-2009 influenza A(H1N1)-NA (101) ATGCCCCCTAATTATCACTATGAGGAATGCTCCTGTTATC  
Yiwu-72-2009 influenza A(H1N1)-NA (102) ATGCCCCCTAATTATCACTATGAGGAATGCTCCTGTTATC  
Yiwu-80-2009 influenza A(H1N1)-NA (104) ATGCCCCCTAATTATCACTATGAGGAATGCTCCTGTTATC  
Yiwu-81-2009 influenza A(H1N1)-NA (100) ATGCCCCCTAATTATCACTATGAGGAATGCTCCTGTTATC  
Yiwu-82-2009 influenza A(H1N1)-NA (99) ATGCCCCCTAATTATCACTATGAGGAATGCTCCTGTTATC  
Yiwu-87-2009 influenza A(H1N1)-NA (99) ATGCCCCCTAATTATCACTATGAGGAATGCTCCTGTTATC  
Yiwu-89-2009 influenza A(H1N1)-NA (99) ATGCCCCCTAATTATCACTATGAGGAATGCTCCTGTTATC  
Yiwu-127-2009 influenza A(H1N1)-NA (98) ATGCCCCCTAATTATCACTATGAGGAATGCTCCTGTTATC  
Yiwu-128-2009 influenza A(H1N1)-NA (99) ATGCCCCCTAATTATCACTATGAGGAATGCTCCTGTTATC  
Yiwu-132-2009 influenza A(H1N1)-NA (98) ATGCCCCCTAATTATCACTATGAGGAATGCTCCTGTTATC  
Yiwu-183-2009 influenza A(H1N1)-NA (102) ATGCCCCCTAATTATCACTATGAGGAATGCTCCTGTTATC  
Yiwu-184-2009 influenza A(H1N1)-NA (101) ATGCCCCCTAATTATCACTATGAGGAATGCTCCTGTTATC  
Consensus (118) ATGCCCCCTAATTATCACTATGAGGAATGCTCCTGTTATC

274H
